# Supplementary material
Source: HighWire-hosted journal article supplement (http://www.jneurosci.org/highwire/filestream/600757/field_highwire_adjunct_files/2/Supplemental_Figures.pdf)

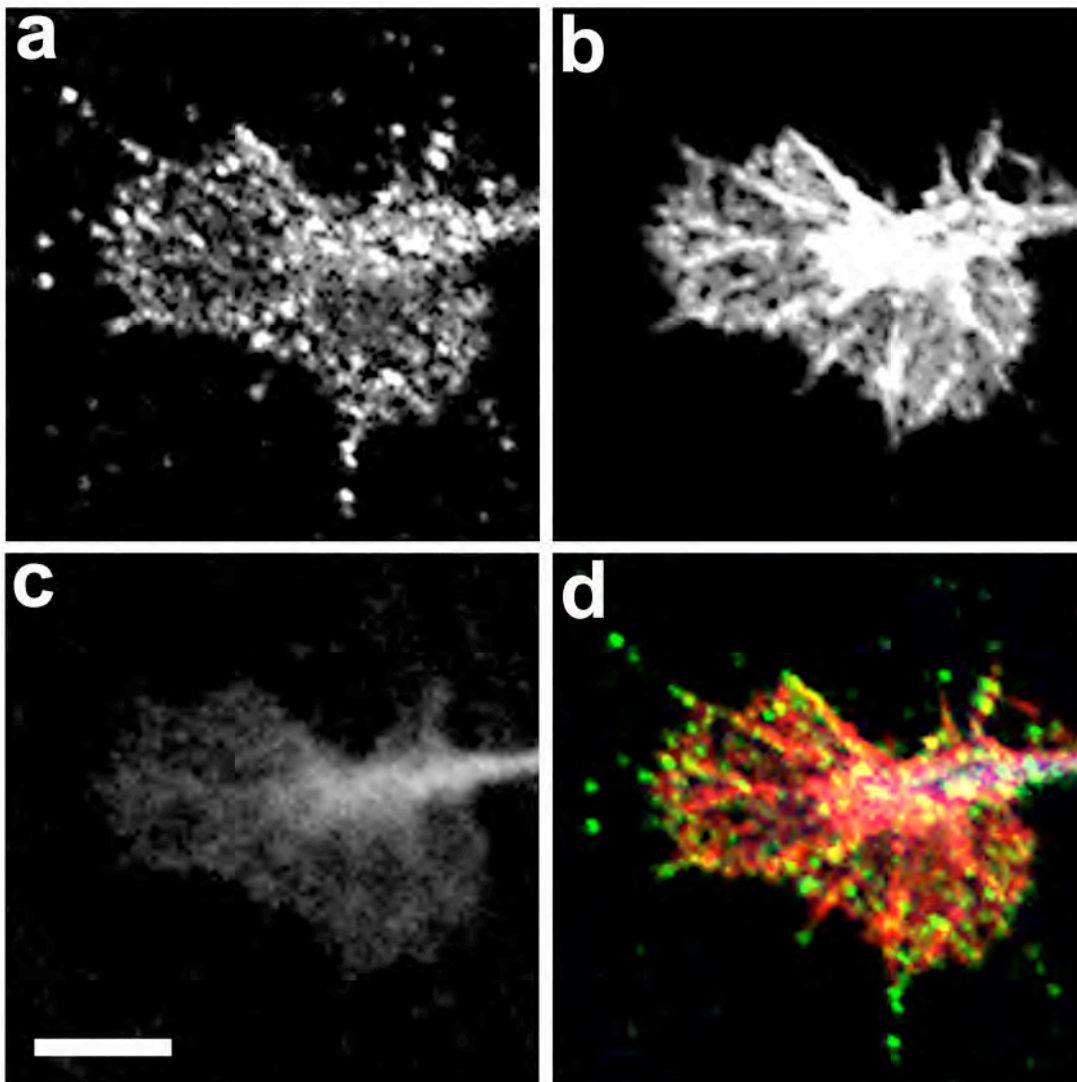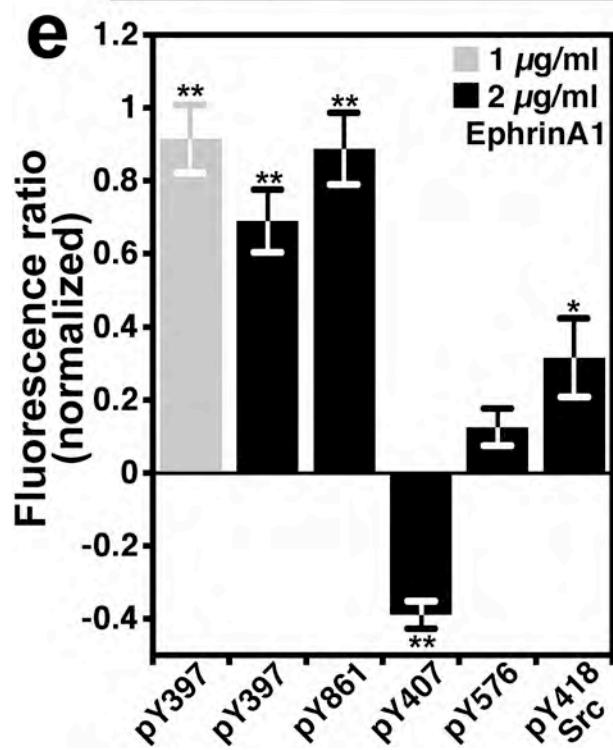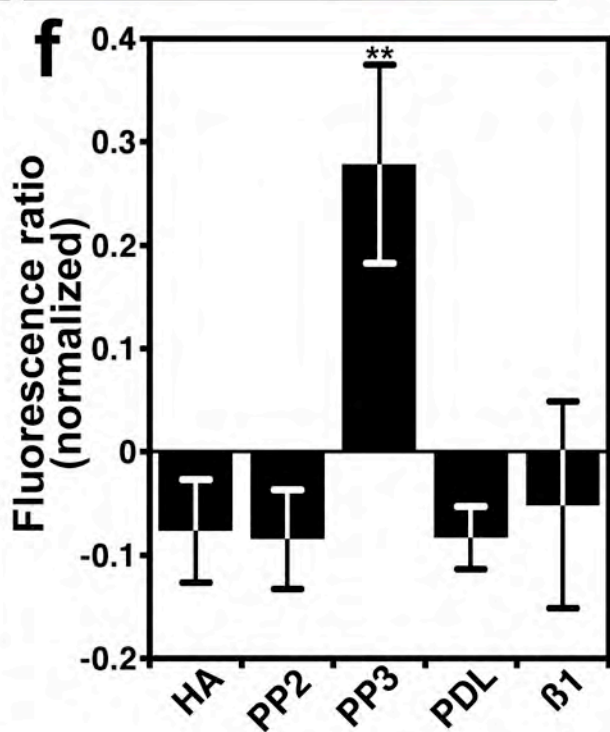

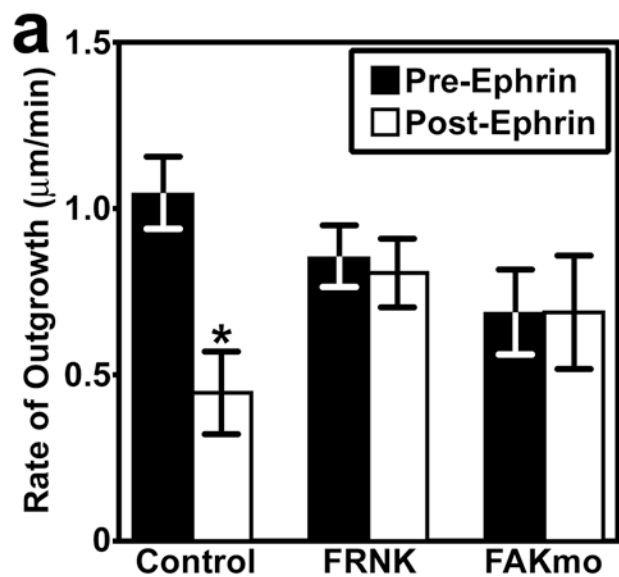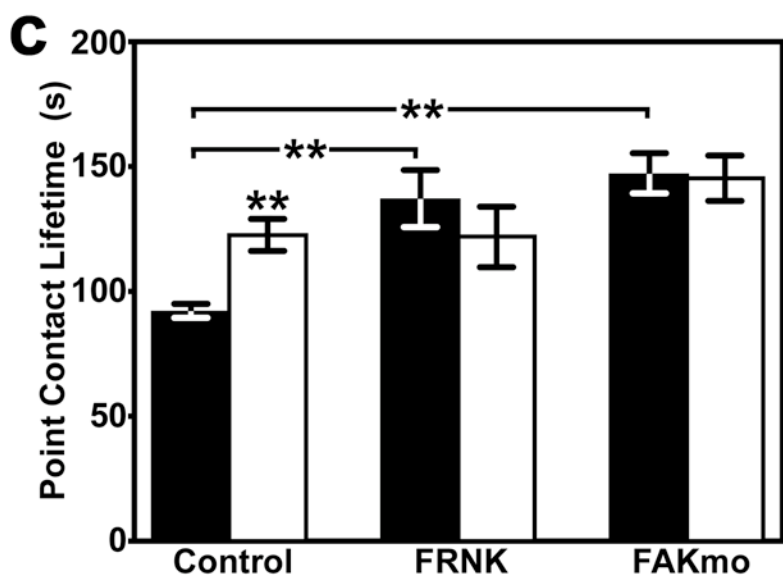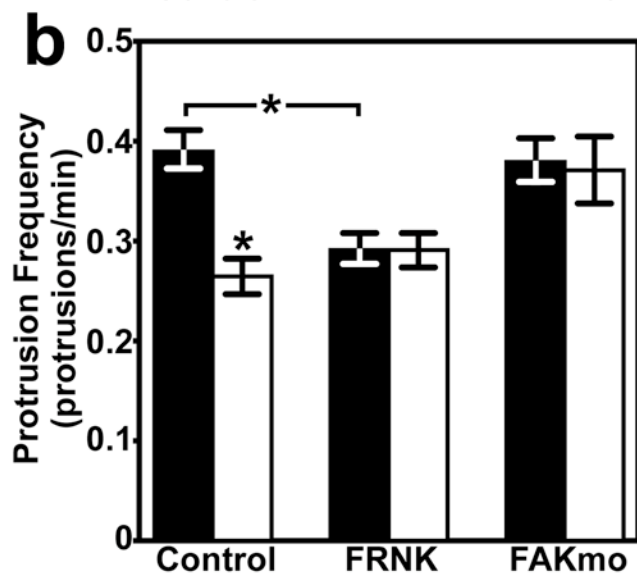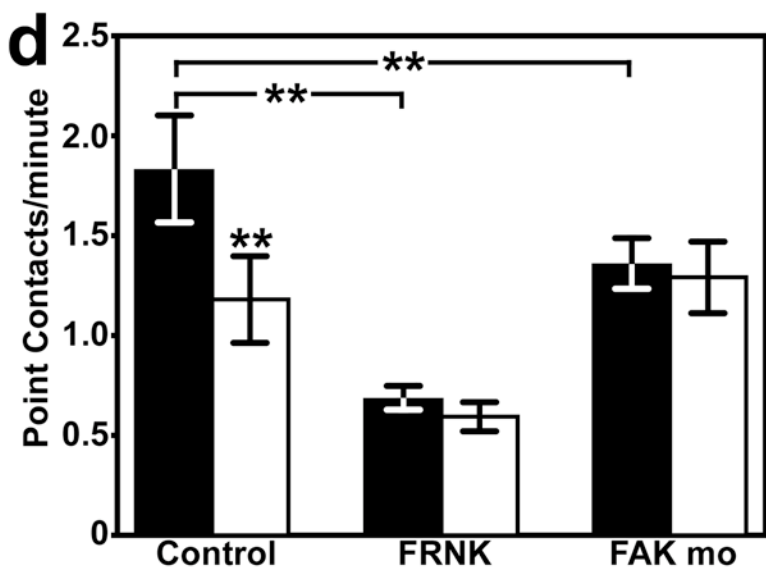

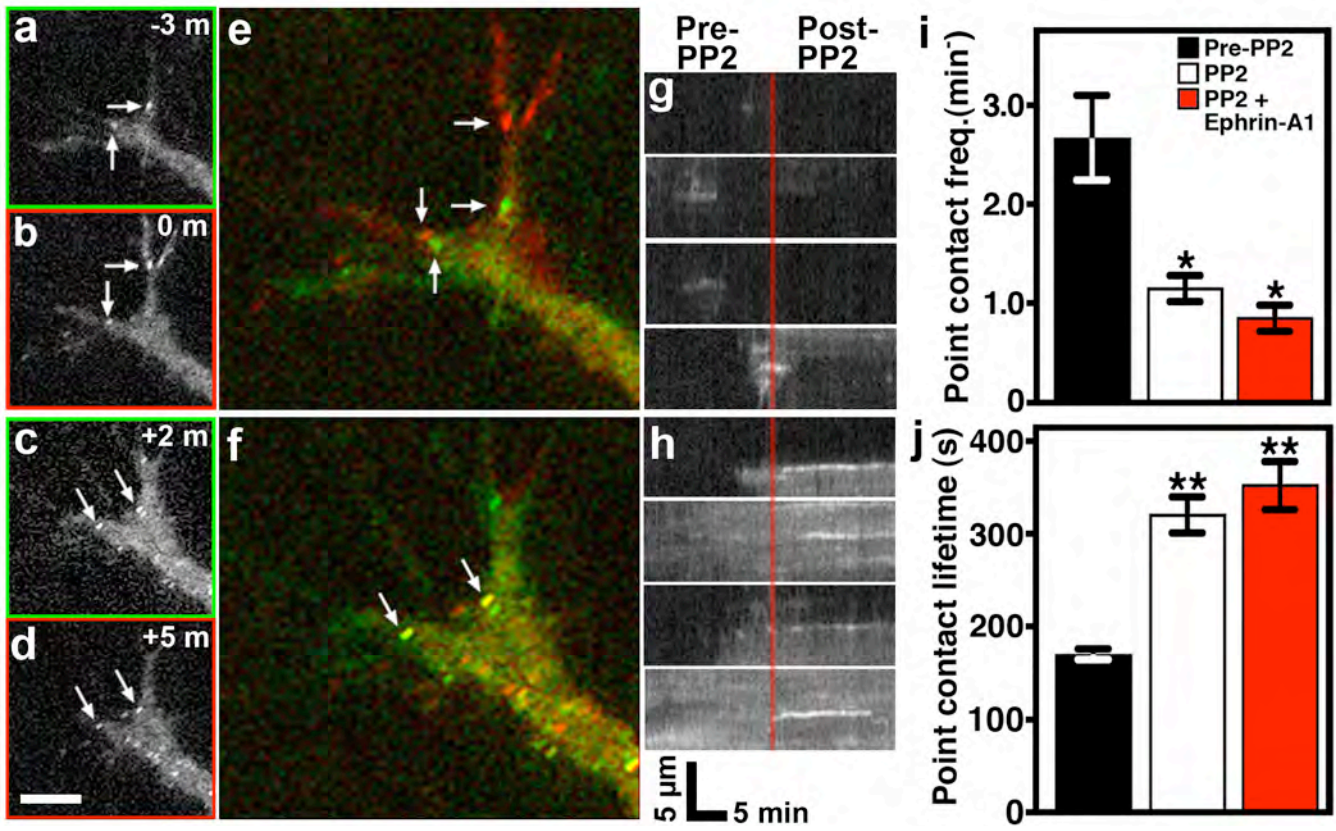

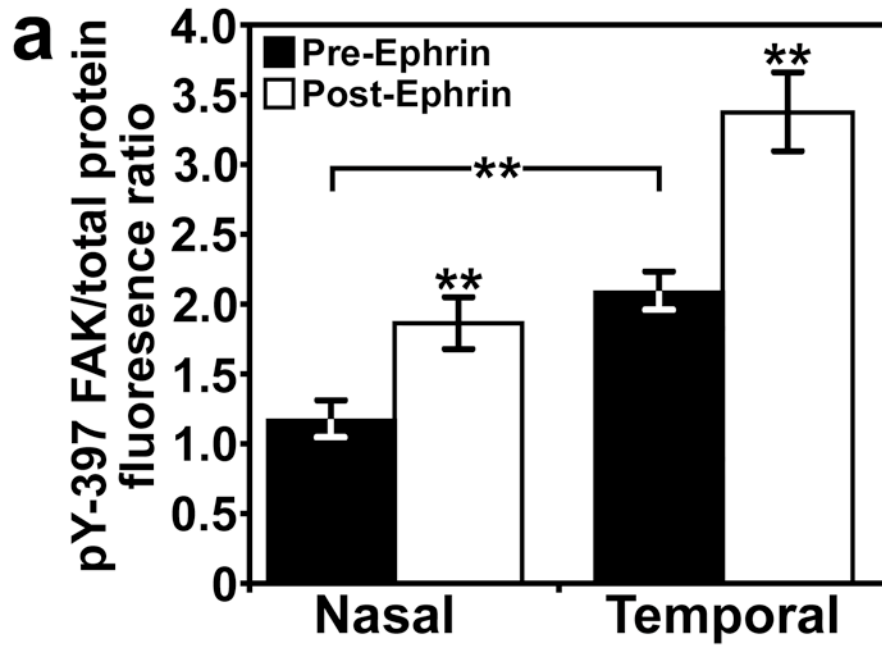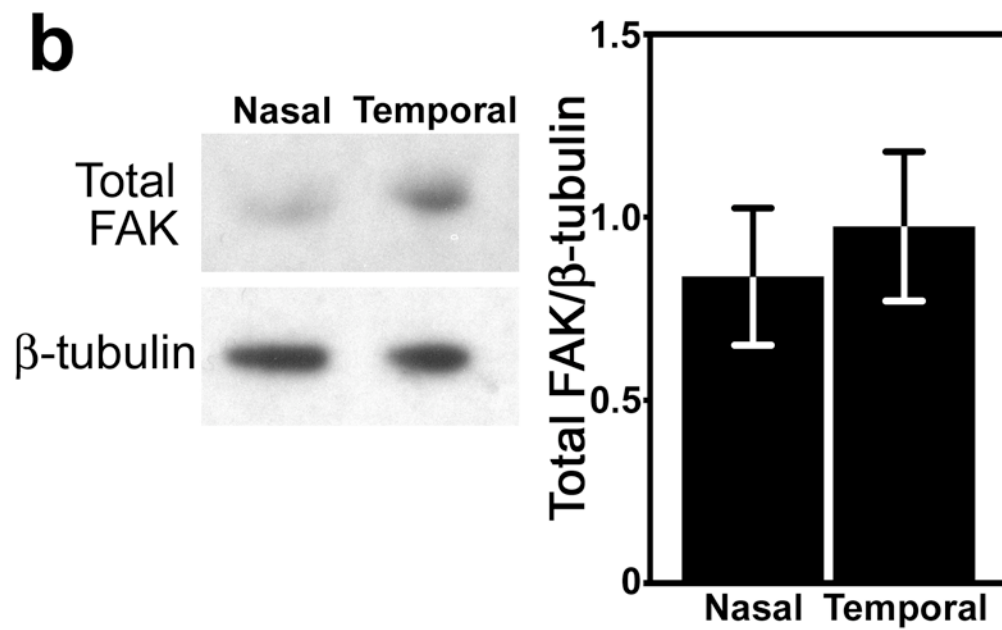

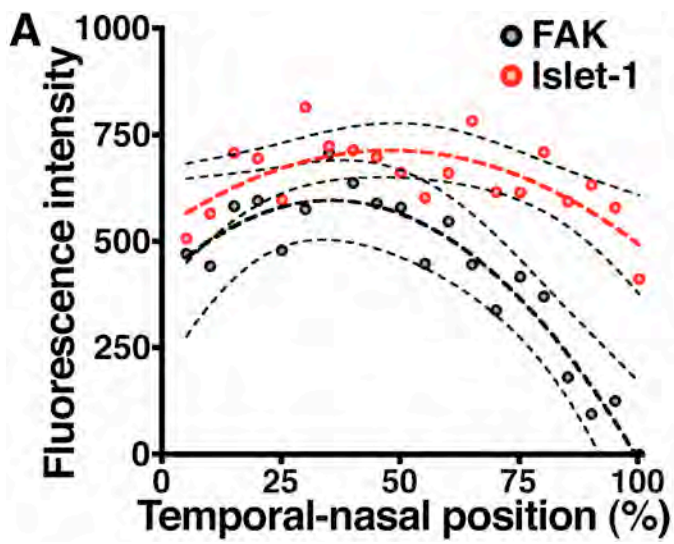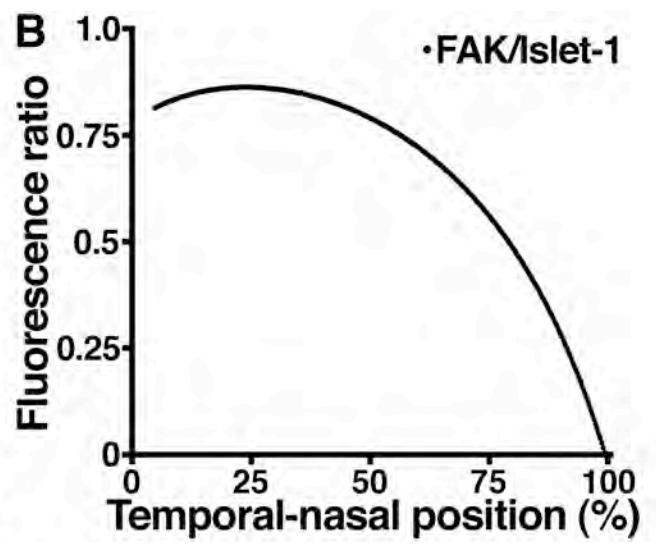

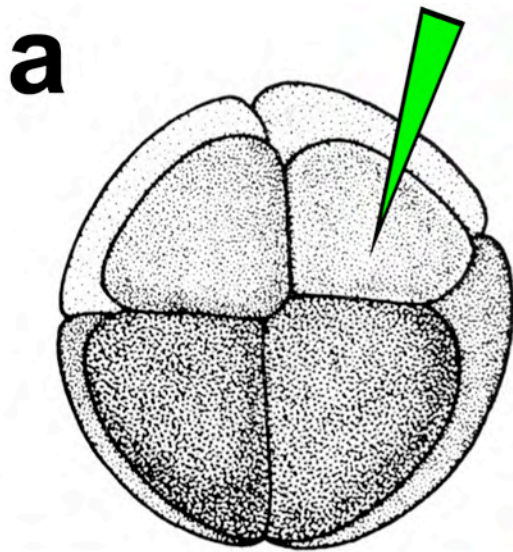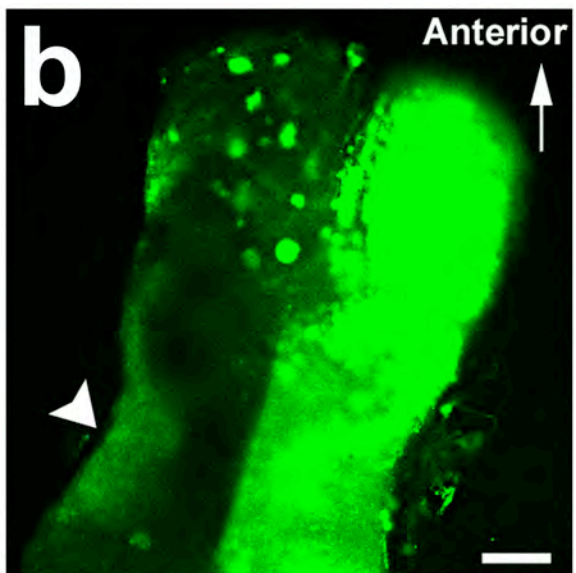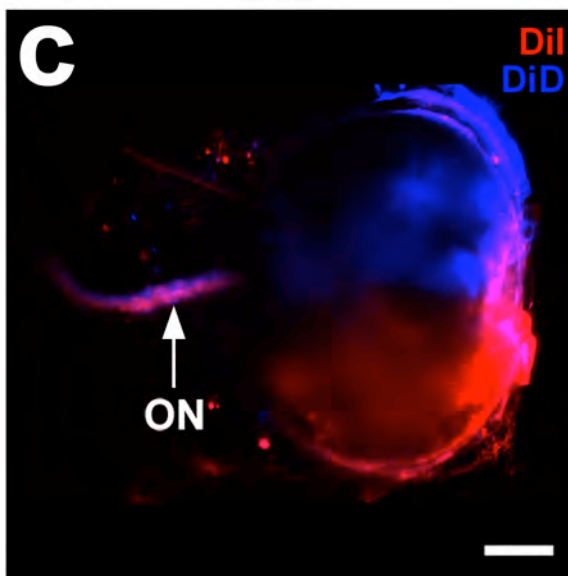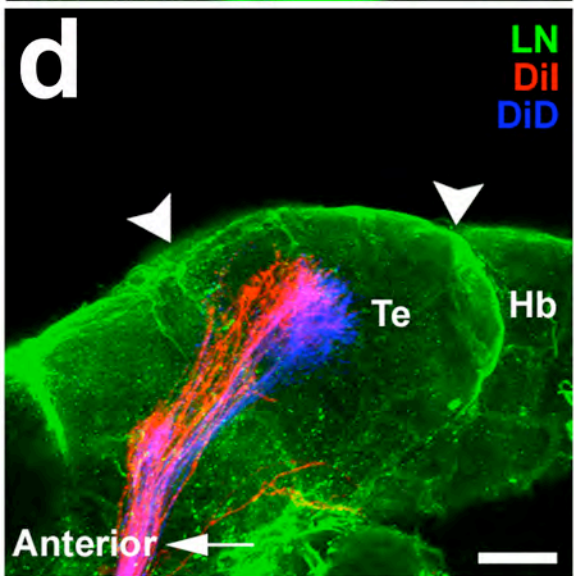

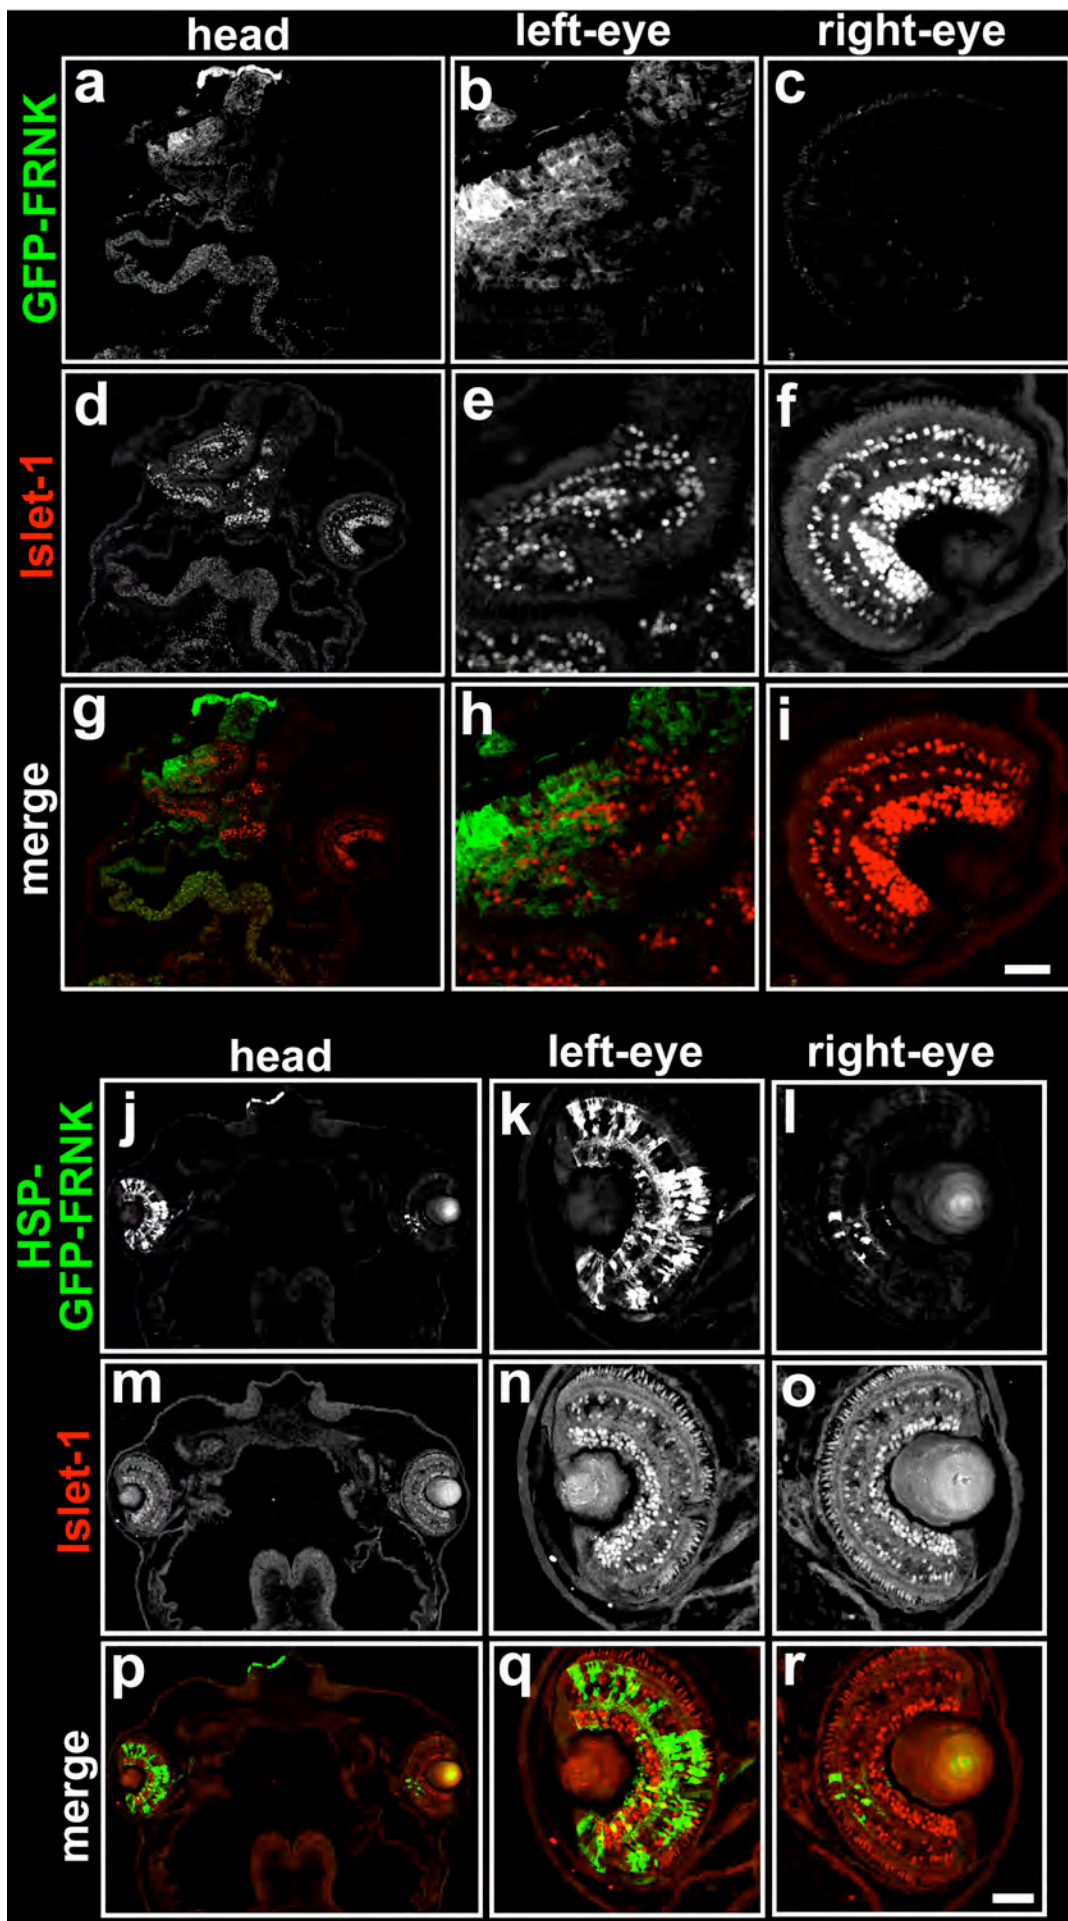

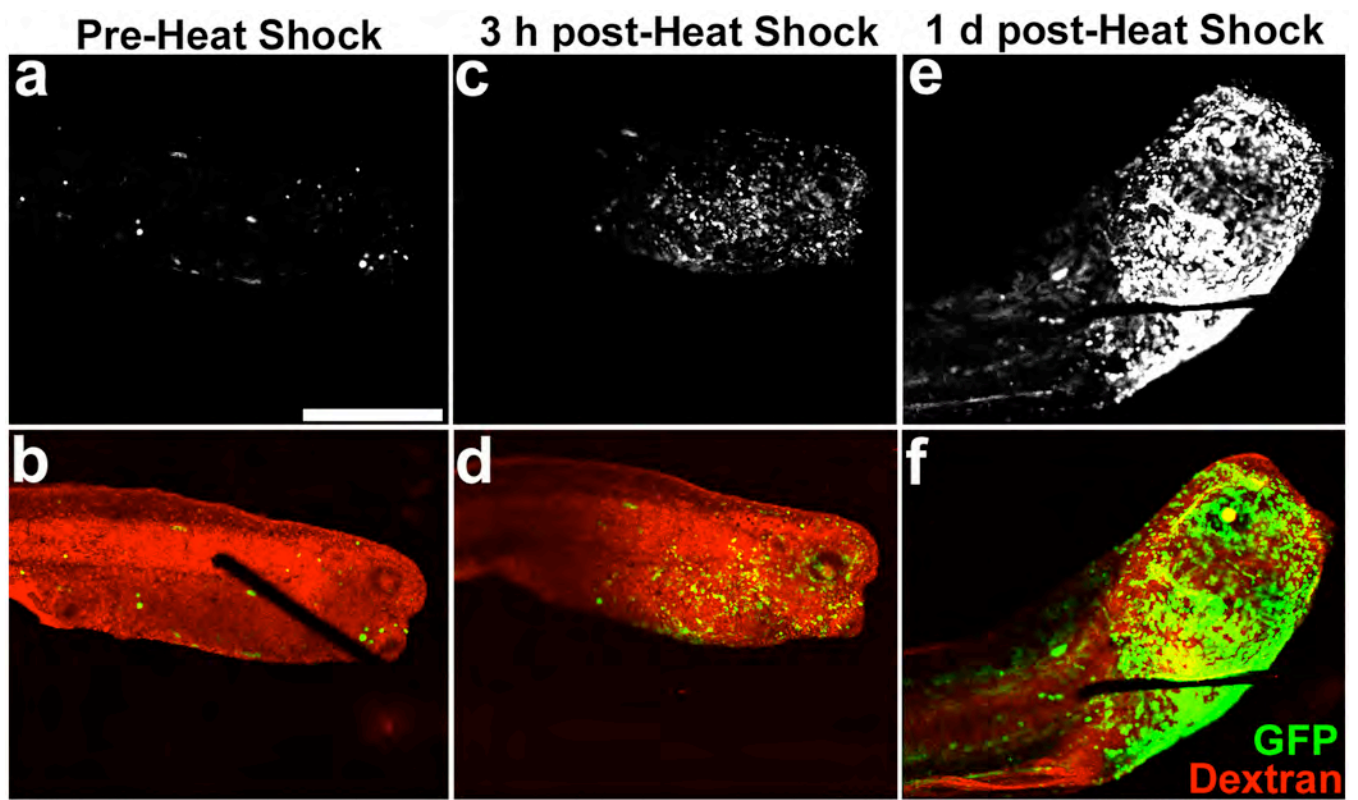



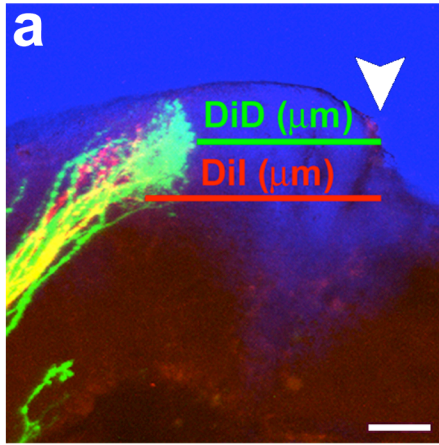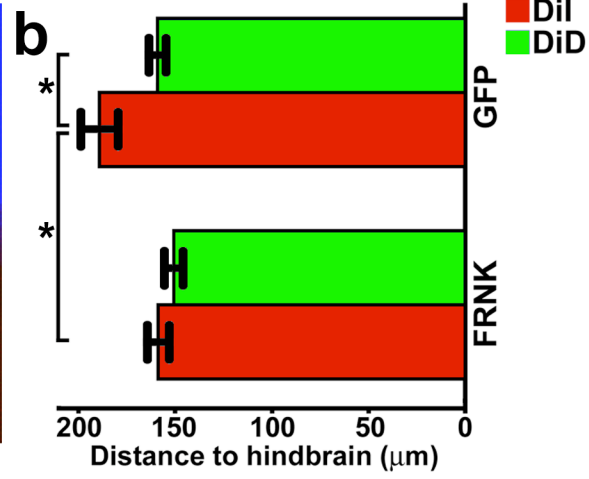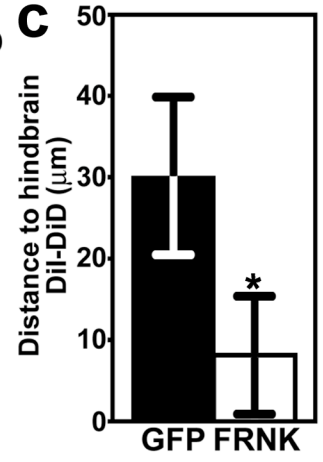

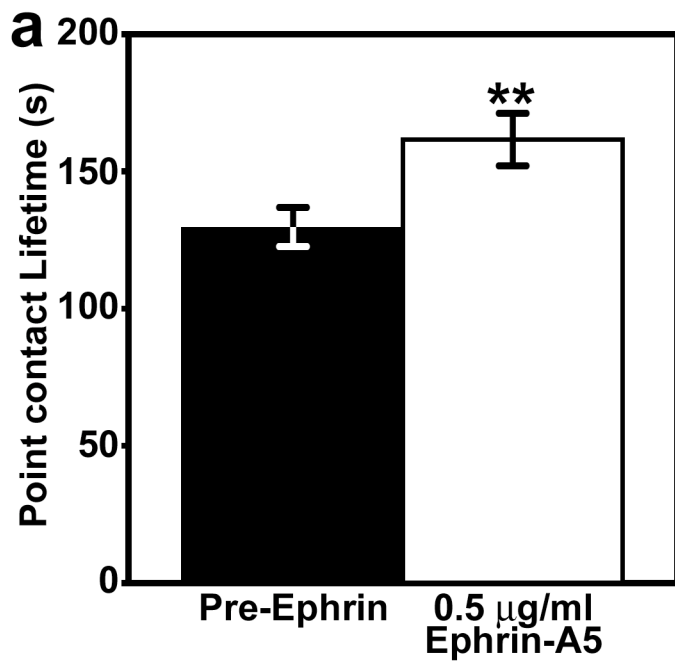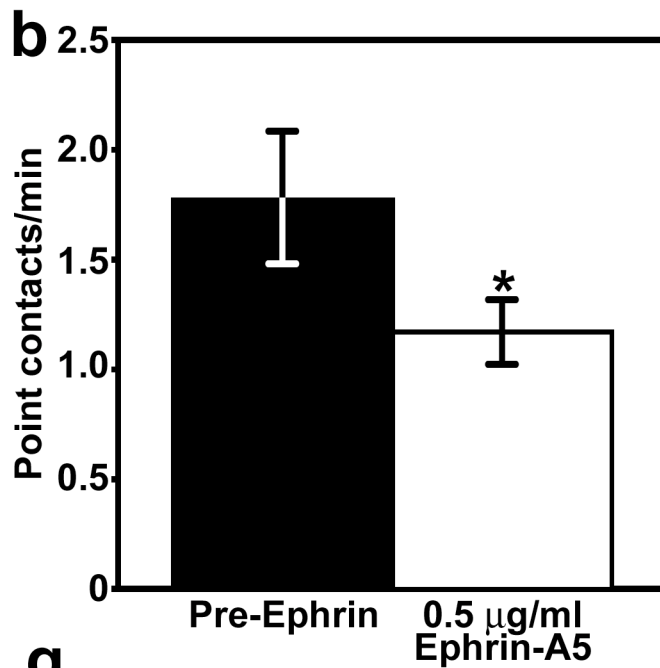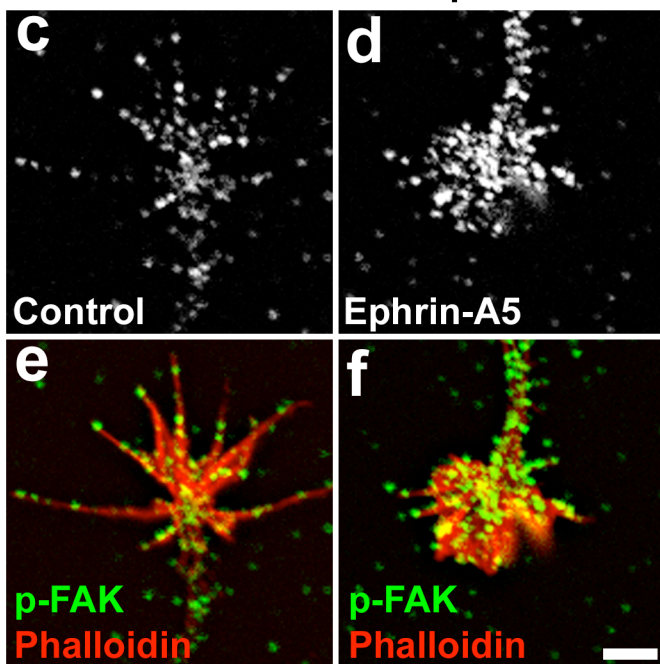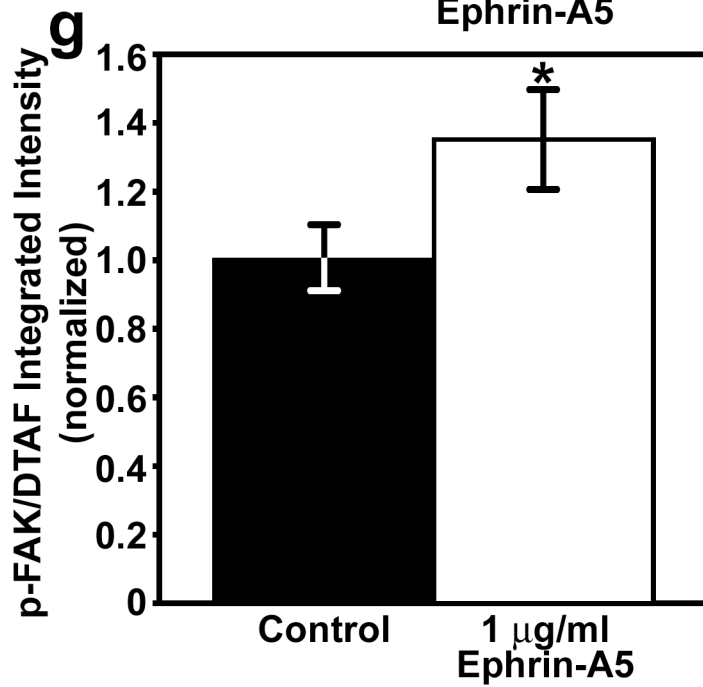

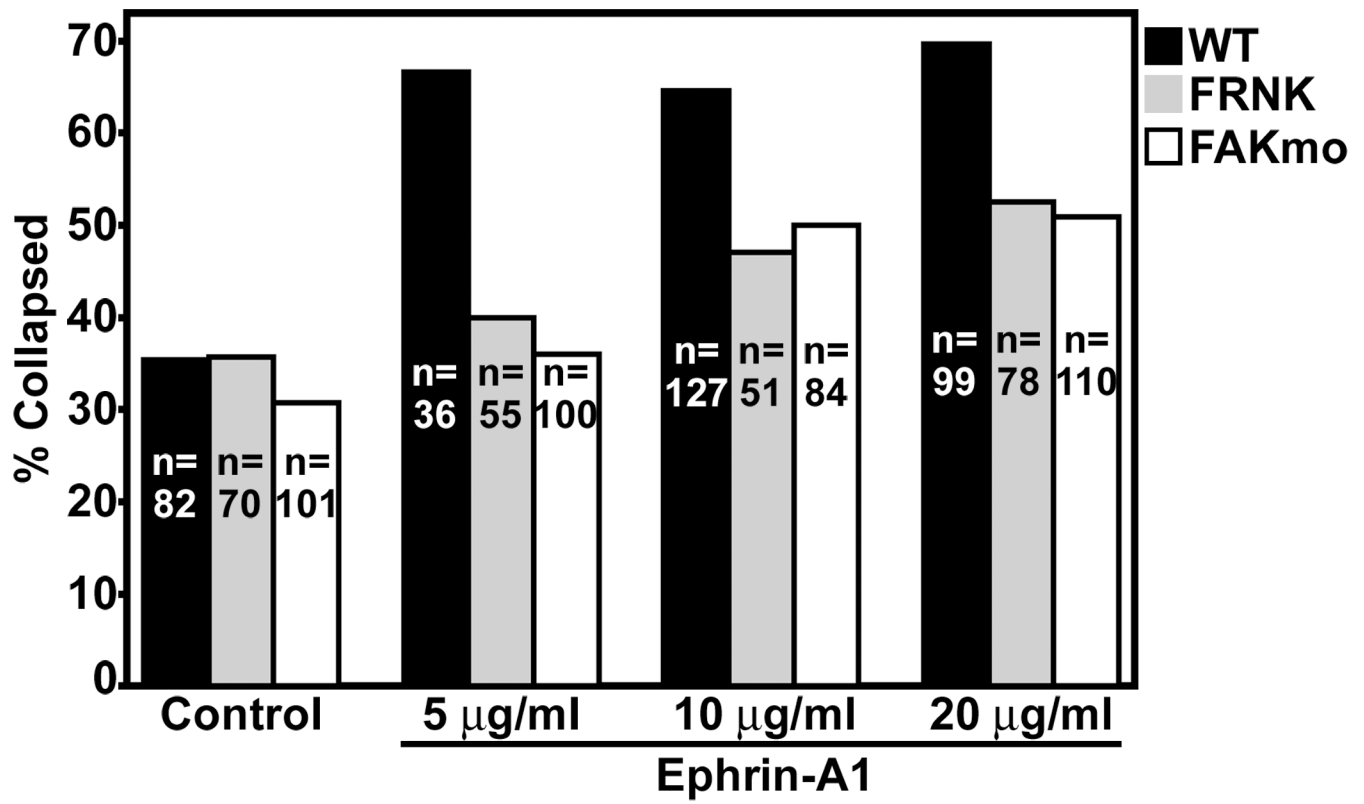

Supplement: Supplemental_Figures.pdf [file Supplemental_Figures.pdf]
